# Supplementary material for: Longitudinal predictors of health-related quality of life in isolated dystonia
Source: Springer Nature journal article supplement (doi:10.1007/s00415-023-12022-4), 2023-10-15

## Longitudinal predictors of health-related quality of life in isolated dystonia

Johanna Junker, MD<sup>1,2</sup>, James Hall, DPhil<sup>3</sup>, Brian D. Berman, MD, MS<sup>4</sup>, Marie Vidailhet, MD<sup>5,6</sup>, Emmanuel Roze, MD, PhD<sup>5</sup>, Tobias Bäumer, MD<sup>7</sup>, Irene A. Malaty, MD<sup>8</sup>, Aparna Wagle Shukla, MD<sup>8</sup>, Joseph Jankovic, MD<sup>9</sup>, Stephen G. Reich, MD<sup>10</sup>, Alberto J. Espay, MD<sup>11</sup>, Kevin R. Duque, MD<sup>11</sup>, Neepa Patel, MD<sup>12</sup>, Joel S. Perlmutter, MD<sup>13</sup>, H. A. Jinnah, MD, PhD<sup>14</sup>, Dystonia Coalition Study Group<sup>15</sup>, Valerie Brandt, PhD<sup>\*16</sup>, Norbert Brüggemann, MD<sup>\*1,2</sup>

<sup>1</sup> Institute of Neurogenetics, University of Luebeck, Luebeck, Germany

<sup>2</sup> Department of Neurology, University of Luebeck, Luebeck, Germany

<sup>3</sup> Southampton Education School, University of Southampton, UK

<sup>4</sup> Department of Neurology, Virginia Commonwealth University, Richmond, VA, USA

<sup>5</sup> AP-HP, Hopital de la Pitie-Salpetriere, Departement de Neurologie, Paris, France

<sup>6</sup> Sorbonne Université, Institut du Cerveau\_ Paris Brain Institute-ICM, INSERM 1127, CNRS 7225, Paris, France

<sup>7</sup> Institute of Systems Motor Science, University of Luebeck, Luebeck, Germany

<sup>8</sup> Department of Neurology, Fixel Institute for Neurologic Disorders, University of Florida, Gainesville, Florida, USA

<sup>9</sup> Parkinson's Disease Center and Movement Disorders Clinic, Department of Neurology, Baylor College of Medicine, Houston, Texas, USA

<sup>10</sup> Department of Neurology, University of Maryland, School of Medicine, Baltimore, MD, USA

<sup>11</sup> Department of Neurology, University of Cincinnati, Cincinnati, OH, USA

<sup>12</sup> RUSH Parkinson's disease and Movement Disorders Center, Department of Neurological Science, RUSH University Medical Center Chicago, Chicago, IL, USA

<sup>13</sup> Departments of Neurology, Radiology & Neuroscience, Washington University in St. Louis, St. Louis, MO, USA

<sup>14</sup> Department of Neurology and Human Genetics, Emory University, Atlanta, GA, USA

<sup>15</sup> see Supplement 1

<sup>16</sup> School of Psychology, Centre for Innovation in Mental Health, University of Southampton, UK

\*These authors have contributed equally to the work

**Journal name: Journal of Neurology**

**Corresponding Author:**

Norbert Brüggemann, MD

Dept. of Neurology and Institute of Neurogenetics, University of Lübeck

Ratzeburger Allee 160

Lübeck, SH, 23538, Germany

Phone +49-451-500 43400

Fax +49-451-500 43404

[norbert.brueggemann@uni-luebeck.de](mailto:norbert.brueggemann@uni-luebeck.de)

<https://orcid.org/0000-0001-5969-6899>

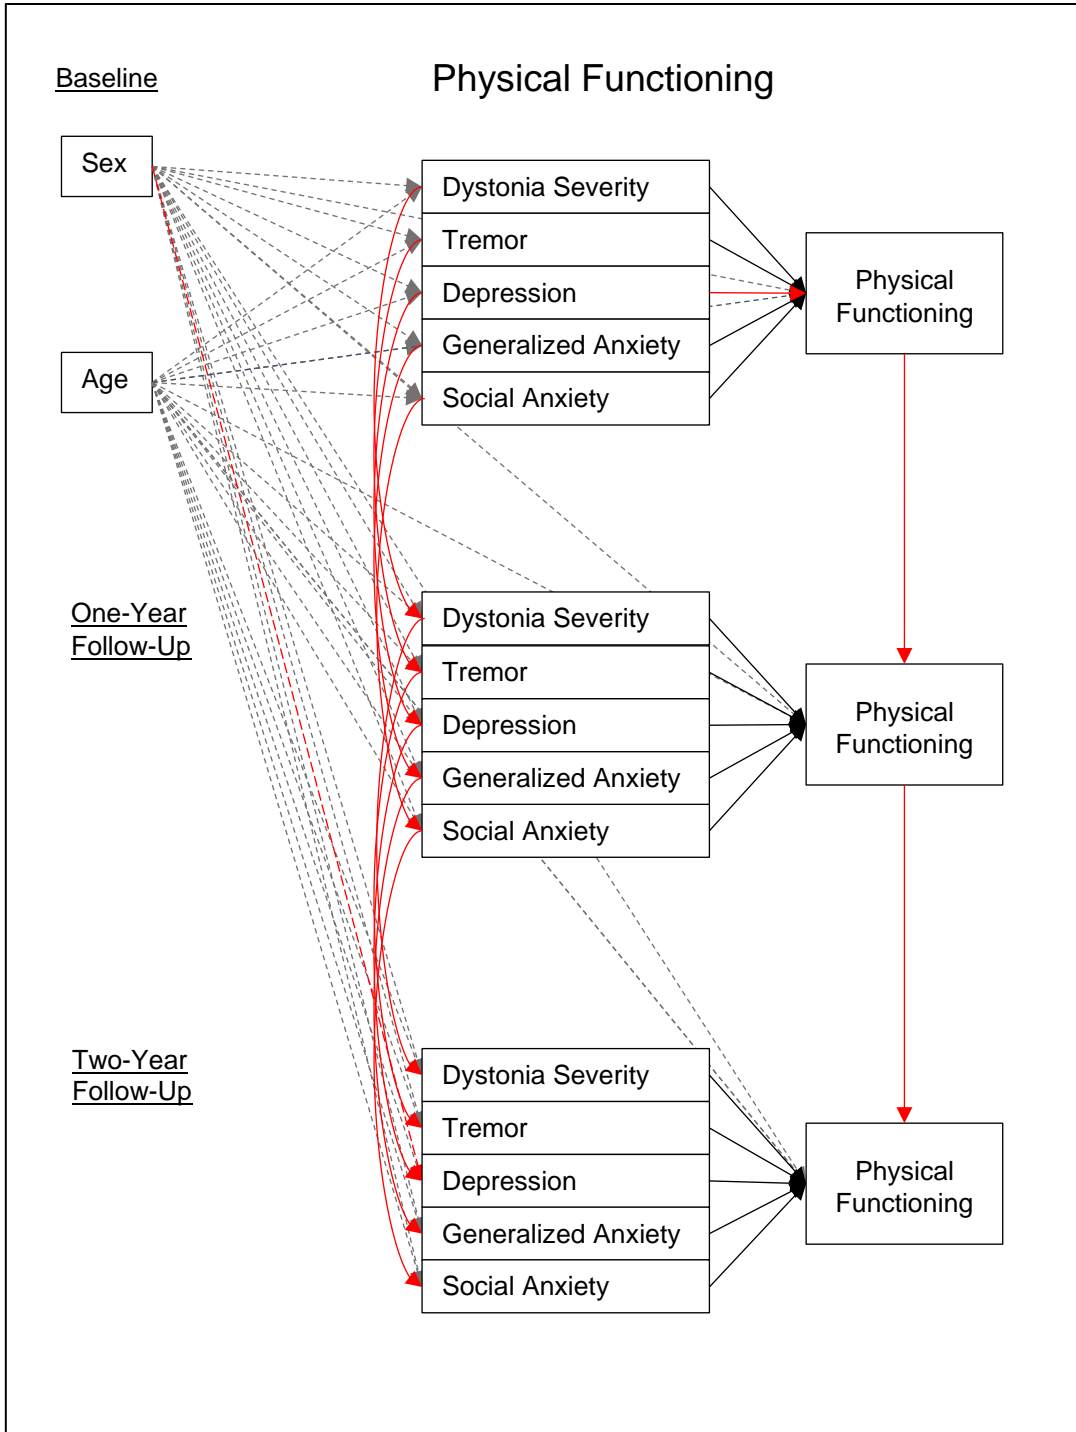

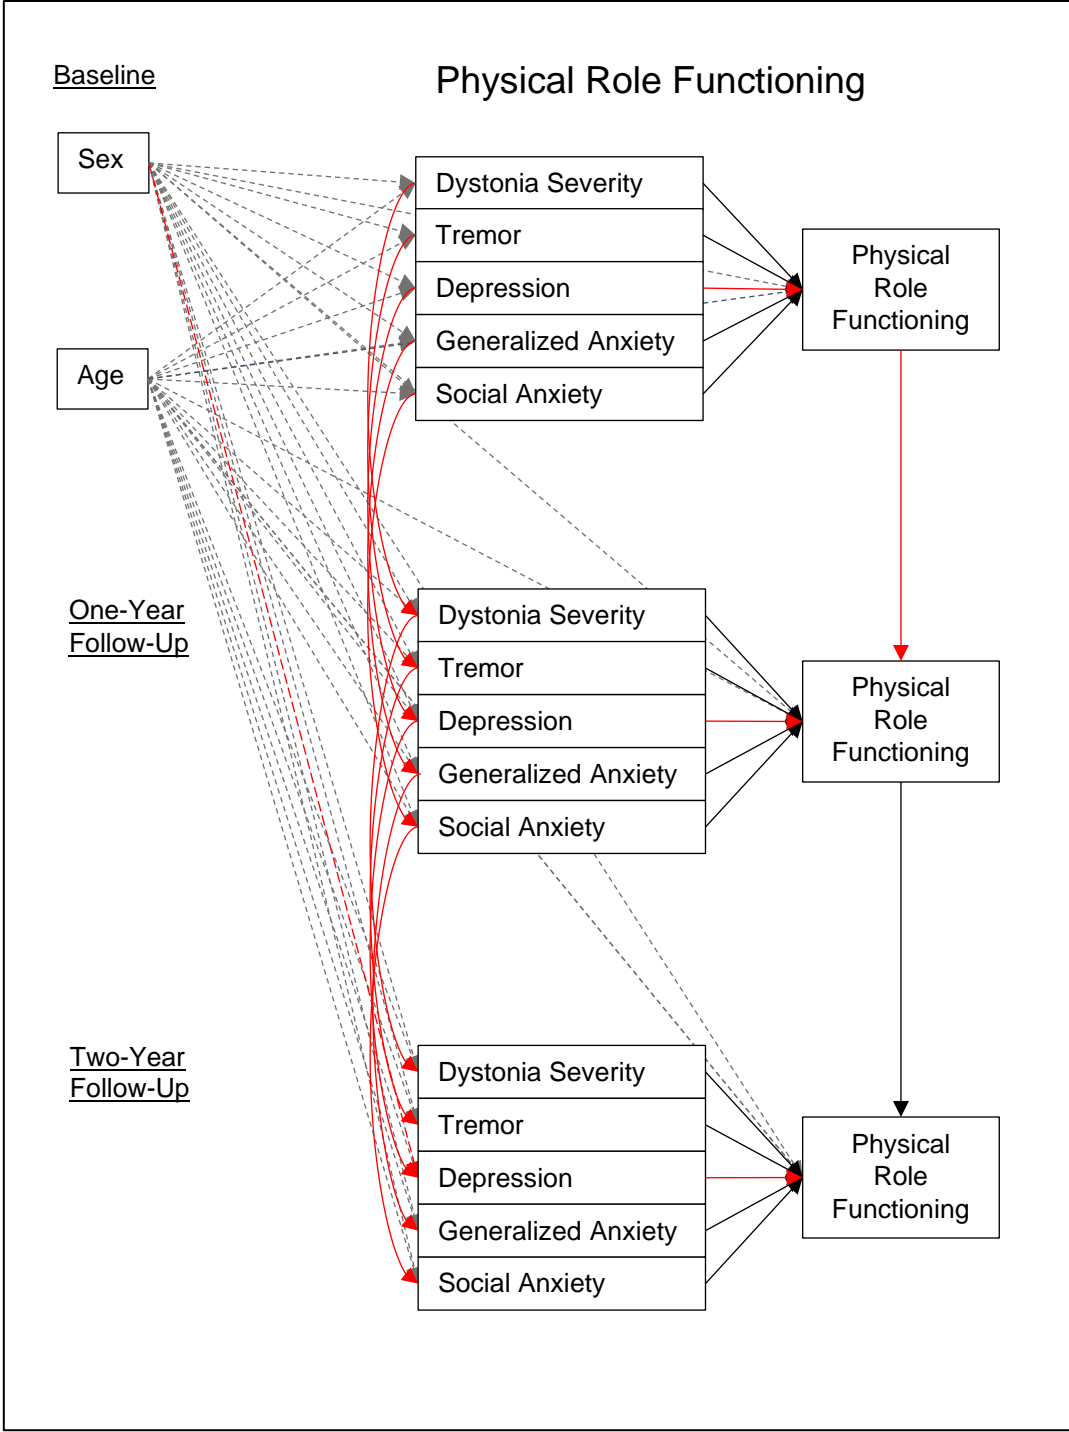

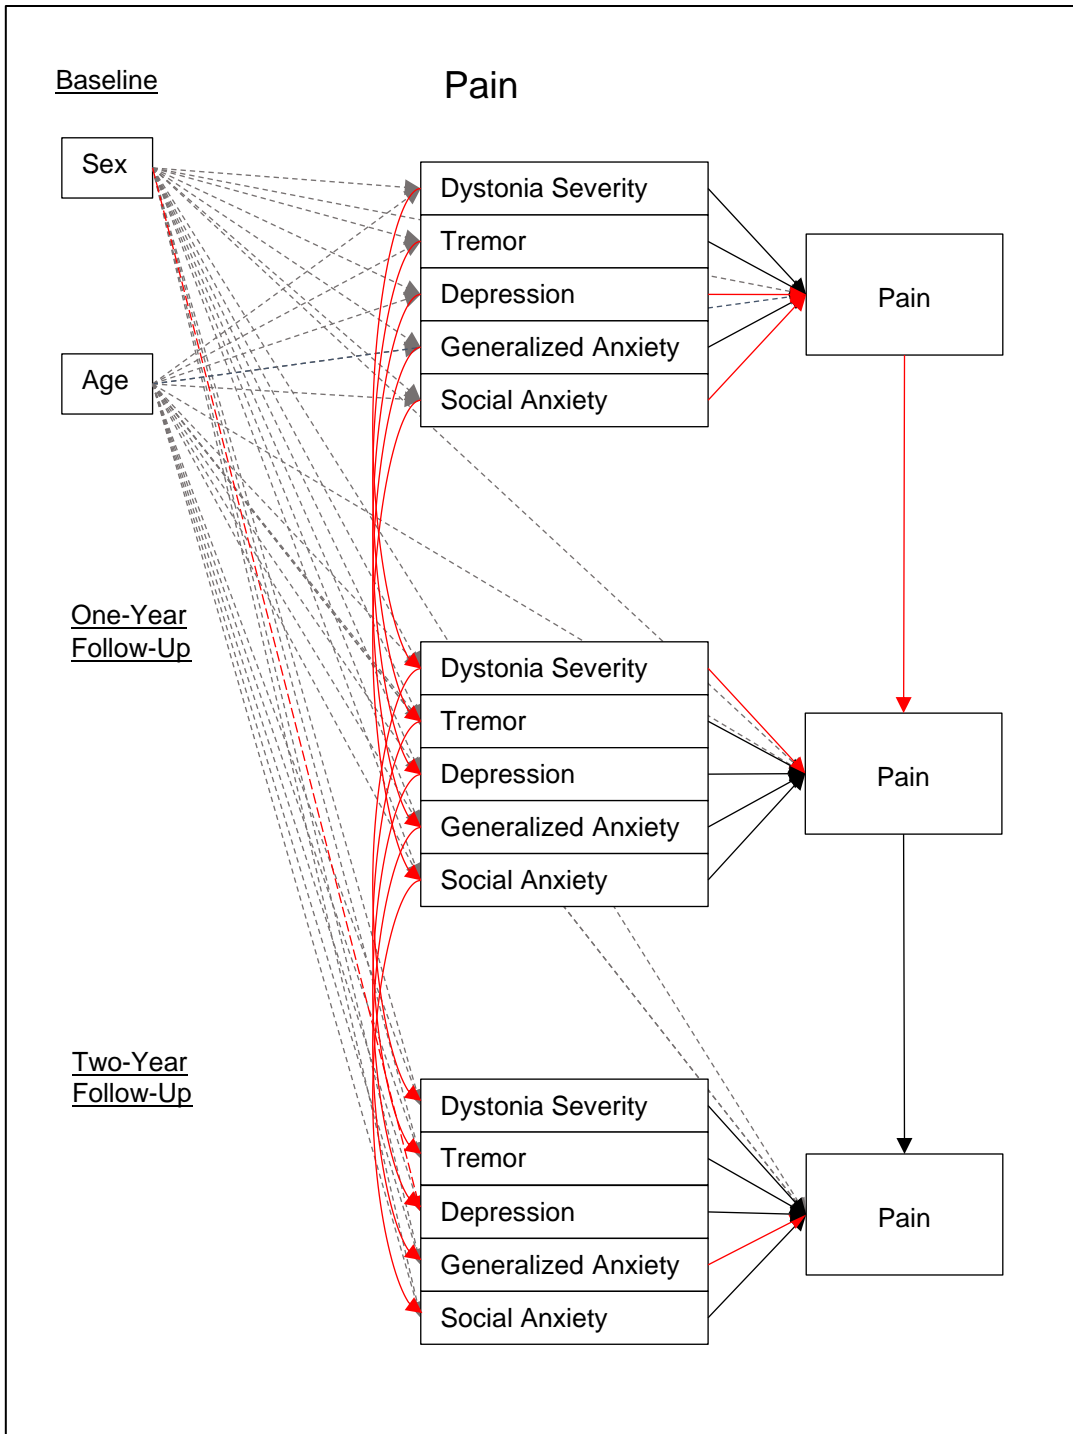

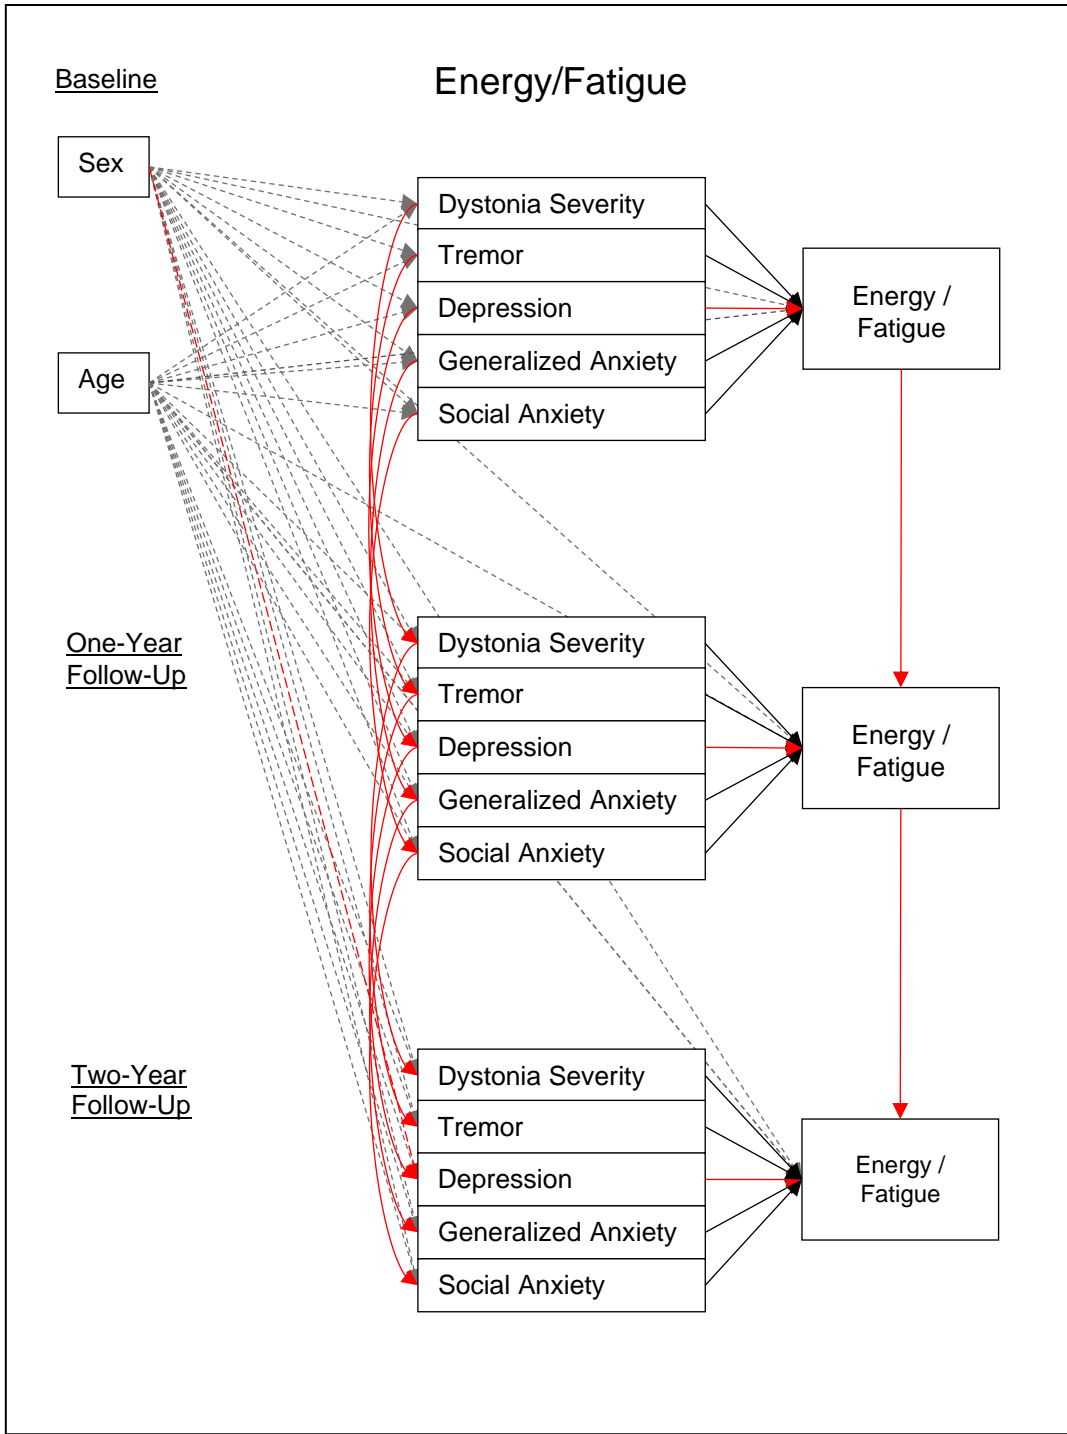

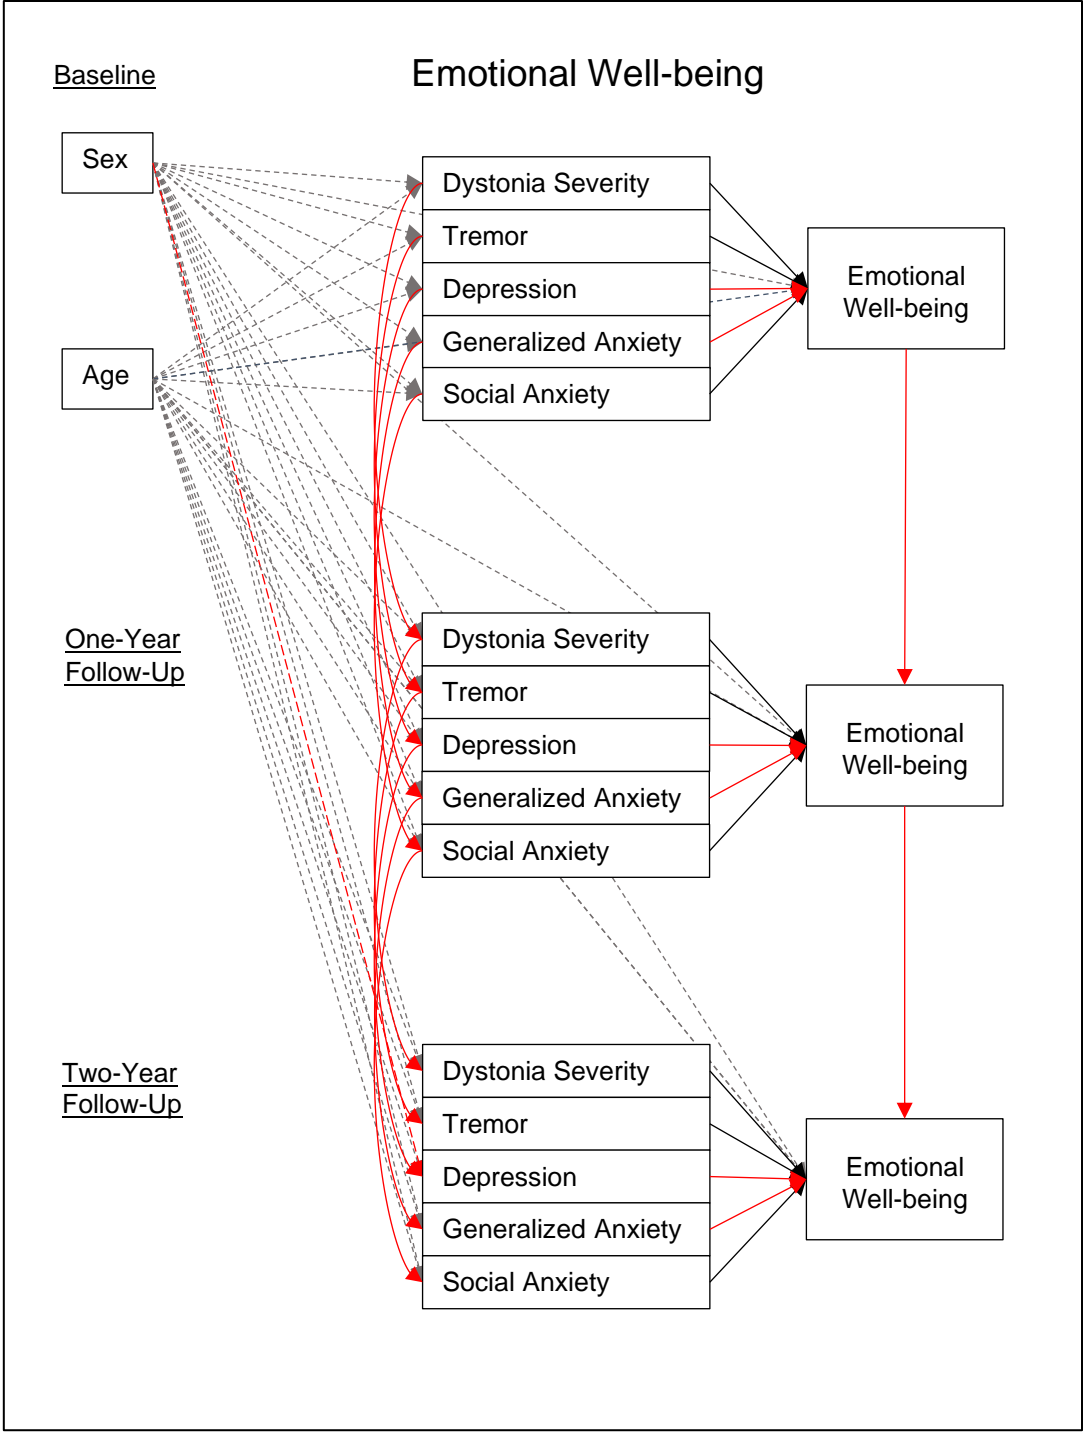

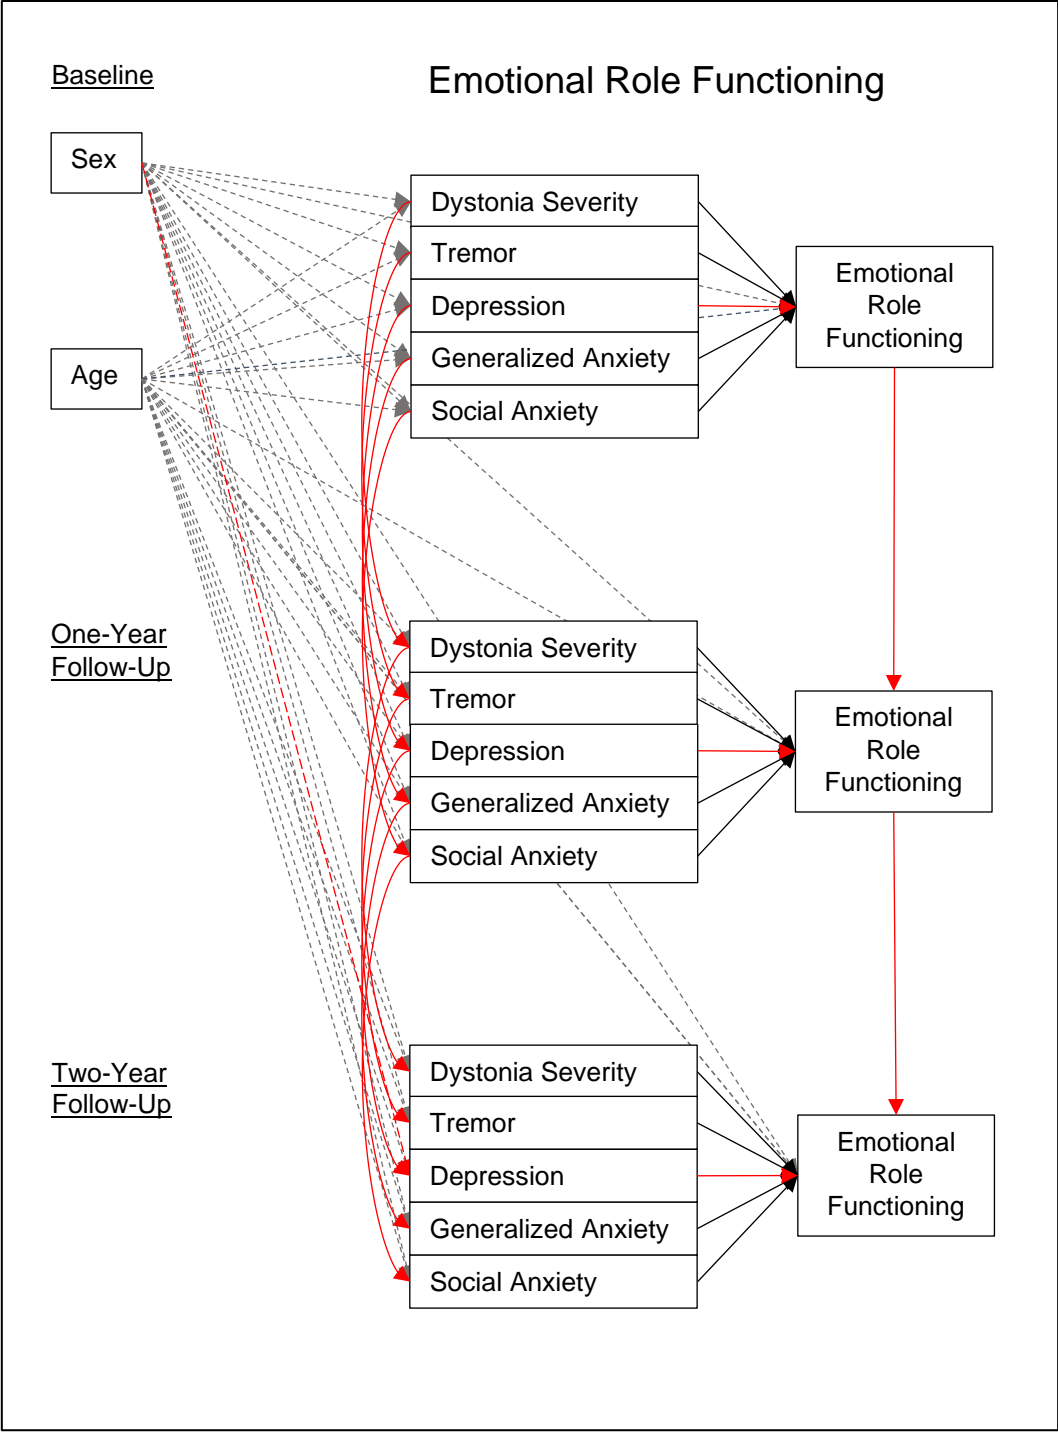

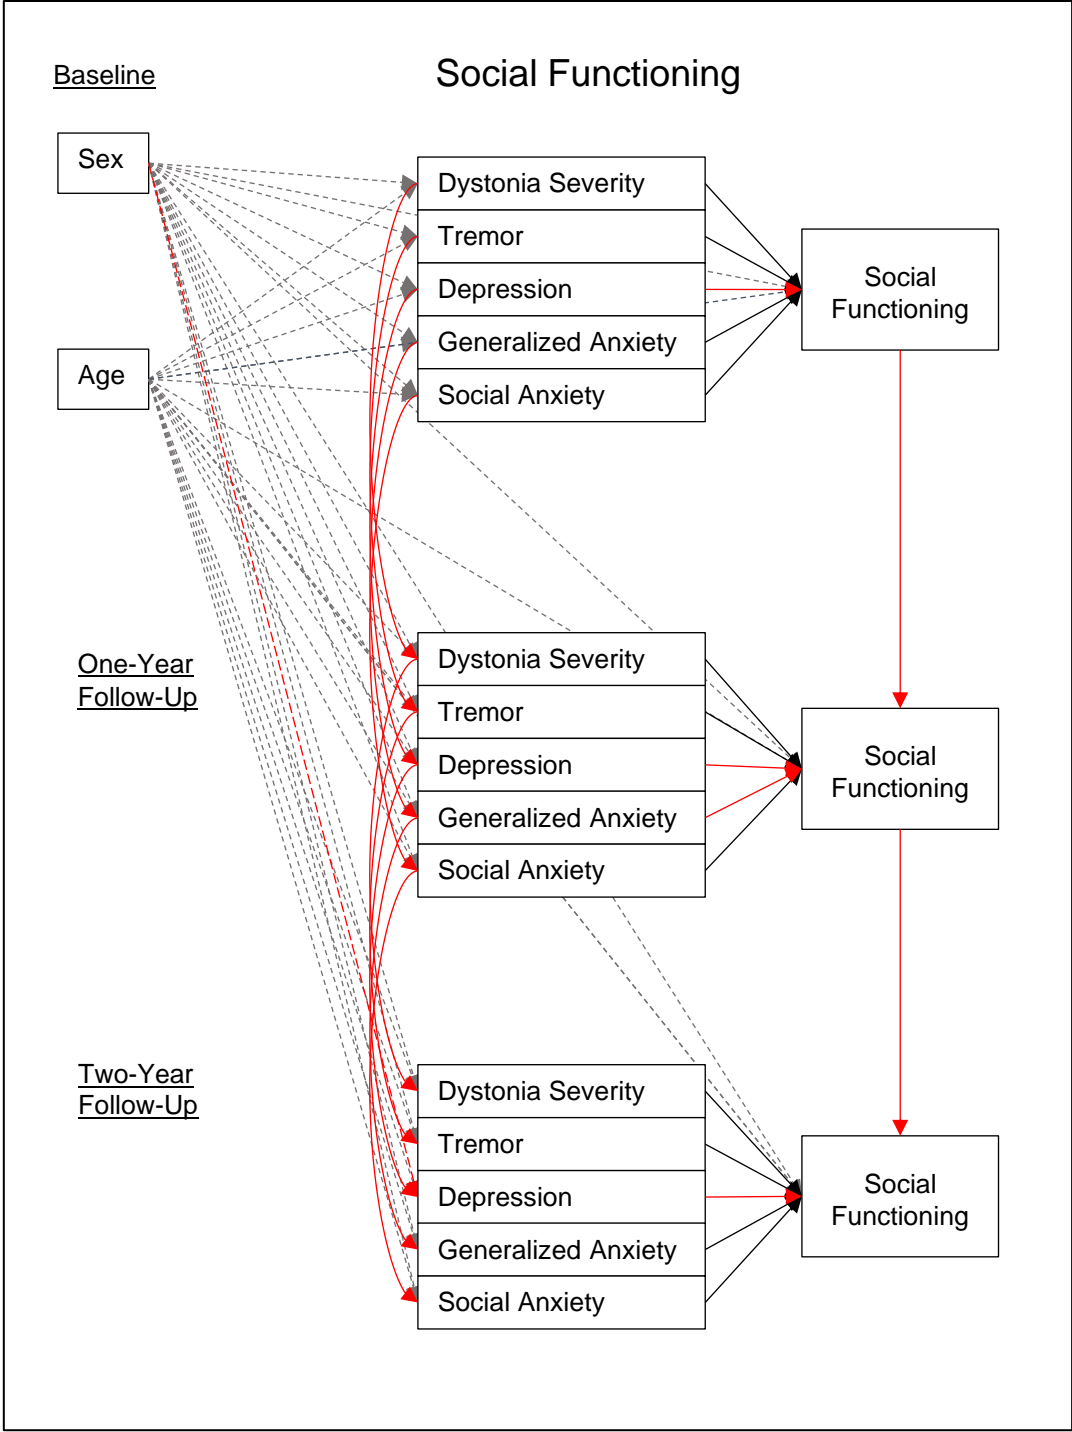

Supplement: MOESM2 [file 26182714]
