# Supplementary material for: Longitudinal predictors of health-related quality of life in isolated dystonia
Source: Springer Nature journal article supplement (doi:10.1007/s00415-023-12022-4), 2023-10-15
Supplement: MOESM1 [file 26182714]

## Longitudinal predictors of health-related quality of life in isolated dystonia

Johanna Junker, MD<sup>1,2</sup>, James Hall, DPhil<sup>3</sup>, Brian D. Berman, MD, MS<sup>4</sup>, Marie Vidailhet, MD<sup>5,6</sup>, Emmanuel Roze, MD, PhD<sup>5</sup>, Tobias Bäumer, MD<sup>7</sup>, Irene A. Malaty, MD<sup>8</sup>, Aparna Wagle Shukla, MD<sup>8</sup>, Joseph Jankovic, MD<sup>9</sup>, Stephen G. Reich, MD<sup>10</sup>, Alberto J. Espay, MD<sup>11</sup>, Kevin R. Duque, MD<sup>11</sup>, Neepa Patel, MD<sup>12</sup>, Joel S. Perlmutter, MD<sup>13</sup>, H. A. Jinnah, MD, PhD<sup>14</sup>, Dystonia Coalition Study Group<sup>15</sup>, Valerie Brandt, PhD<sup>\*16</sup>, Norbert Brüggemann, MD<sup>\*1,2</sup>

<sup>1</sup> Institute of Neurogenetics, University of Luebeck, Luebeck, Germany

<sup>2</sup> Department of Neurology, University of Luebeck, Luebeck, Germany

<sup>3</sup> Southampton Education School, University of Southampton, UK

<sup>4</sup> Department of Neurology, Virginia Commonwealth University, Richmond, VA, USA

<sup>5</sup> AP-HP, Hopital de la Pitie-Salpetriere, Departement de Neurologie, Paris, France

<sup>6</sup> Sorbonne Université, Institut du Cerveau\_ Paris Brain Institute-ICM, INSERM 1127, CNRS 7225, Paris, France

<sup>7</sup> Institute of Systems Motor Science, University of Luebeck, Luebeck, Germany

<sup>8</sup> Department of Neurology, Fixel Institute for Neurologic Disorders, University of Florida, Gainesville, Florida, USA

<sup>9</sup> Parkinson's Disease Center and Movement Disorders Clinic, Department of Neurology, Baylor College of Medicine, Houston, Texas, USA

<sup>10</sup> Department of Neurology, University of Maryland, School of Medicine, Baltimore, MD, USA

<sup>11</sup> Department of Neurology, University of Cincinnati, Cincinnati, OH, USA

<sup>12</sup> RUSH Parkinson's disease and Movement Disorders Center, Department of Neurological Science, RUSH University Medical Center Chicago, Chicago, IL, USA

<sup>13</sup> Departments of Neurology, Radiology & Neuroscience, Washington University in St. Louis, St. Louis, MO, USA

<sup>14</sup> Department of Neurology and Human Genetics, Emory University, Atlanta, GA, USA

<sup>15</sup> see Supplement 1

<sup>16</sup> School of Psychology, Centre for Innovation in Mental Health, University of Southampton, UK

\*These authors have contributed equally to the work

**Journal name: Journal of Neurology**

**Corresponding Author:**

Norbert Brüggemann, MD

Dept. of Neurology and Institute of Neurogenetics, University of Lübeck

Ratzeburger Allee 160

Lübeck, SH, 23538, Germany

Phone +49-451-500 43400

Fax +49-451-500 43404

[norbert.brueggemann@uni-luebeck.de](mailto:norbert.brueggemann@uni-luebeck.de)

<https://orcid.org/0000-0001-5969-6899>

## Supplement 1

Coinvestigators of the Dystonia Coalition Study Group, that had a major role in the acquisition of data:

| <b>Name</b>                     | <b>Affiliations</b>                                                      |
|---------------------------------|--------------------------------------------------------------------------|
| Agarwal P., MD, FAAN            | Booth Gardner Parkinson Care Center (Kirkland, WA, USA)                  |
| Barbano R. L., MD, PhD          | University of Rochester (Rochester, NY, USA)                             |
| Berardelli A., MD               | Università Degli Studi Di Roma „La Sapienza“ (Rome, Italy)               |
| Berman B., MD                   | University of Colorado (Aurora, CO, USA)                                 |
| Brashear A., MD                 | Wake Forest Health Sciences (Winston-Salem, NC, USA)                     |
| Chouinard S., MD                | CHUM, University of Montreal (Montreal, Quebec, Canada)                  |
| Comella C. L., MD               | Rush University (Chicago, IL, USA)                                       |
| Espay A., MD                    | University of Cincinnati (Cincinnati, OH, USA)                           |
| Fox S. H., MD, PhD              | Toronto Western Hospital (Toronto, Ontario, Canada)                      |
| Fung V. S. C., MD               | Westmead Hospital (Westmead, New South Wales, Australia)                 |
| Grill S., MD, PhD               | Parkinsons and Movement Disorders Center of Maryland (Elkridge, MD, USA) |
| Hallett M., MD                  | National Institutes of Health (Bethesda, Maryland, USA)                  |
| Harlow T. L., MD                | Sanford Health - Fargo (Fargo, ND, USA)                                  |
| Jankovic J., MD                 | Baylor College of Medicine (Houston, TX, USA)                            |
| Jinnah H. A., MD, PhD           | Emory University (Atlanta, GA, USA)                                      |
| Khemani P., MD<br>Patel, N., MD | University of Texas Southwestern (Dallas, TX, USA)                       |
| Klein C., MD                    | University of Luebeck (Luebeck, Germany)                                 |
| LeDoux M. S., MD, PhD           | University of Tennessee (Memphis, TN, USA)                               |
| Leegwater-Kim J., MD, PhD       | Lahey Clinic (Burlington, MA, USA)                                       |
| Malaty I., MD                   | University of Florida (Gainesville, FL, USA)                             |
| Mari Z. K., MD                  | Johns Hopkins University (Baltimore, MD, USA)                            |

|                                         |                                                                                                   |
|-----------------------------------------|---------------------------------------------------------------------------------------------------|
| Nahab, F. B., MD                        | University of California San Diego (La Jolla, CA, USA)                                            |
| Ondo W. G., MD                          | Methodist Hospital Research Institute (Houston, TX, USA)<br>University of Texas (Austin, TX, USA) |
| Perlmutter J., MD                       | Washington University in St. Louis (St. Louis, MO, USA)                                           |
| Reich S., MD                            | University of Maryland (Baltimore, MD, USA)                                                       |
| Richardson S. P., MD                    | University of New Mexico (Albuquerque, NM, USA)                                                   |
| Severt L., MD                           | Beth Israel Medical Center (New York, NY, USA)                                                    |
| Shih L., MD                             | Beth Israel Deaconess (Boston, MA, USA)                                                           |
| Stover N., MD                           | University of Alabama (Tuscaloosa, AL, USA)                                                       |
| Suchowersky O., MD                      | University of Alberta (Edmonton, Alberta, Canada)                                                 |
| Testa C. M., MD, PhD                    | Virginia Commonwealth University (Richmond, VA, USA)                                              |
| Truong D., MD                           | Parkinson`s and Movement Disorders Institute (Fountain Valley, CA, USA)                           |
| Uc, E. Y., MD                           | University of Iowa (Iowa City, IA, USA)                                                           |
| Vidaihet M., MD;<br>Flamand-Roze E., MD | Hospital de la Salpetriere (Paris, France)                                                        |
| Xie T., MD, PhD                         | University of Chicago (Chicago, IL, USA)                                                          |
